# Supplementary material
Source: Springer Nature journal article supplement (https://www.springermedizin.de/resource/supplementary/12943_2013_1121_MOESM4_ESM.pdf/9552532)

**A**  
 $\alpha$ -SMA -556 to -526

5'- AGTTCCTGGTTTCATTACTACAACACAA -3'

3'- TTTGTGTTGTAGTAATGAAACCAGGAAC -5'

**B**

Rapa (nM)      Probe    0      20      40      Mutant

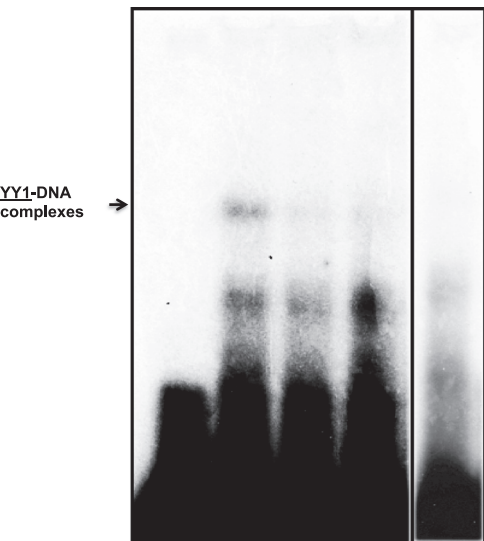**C**

Probe    IgG    YY1 antibody

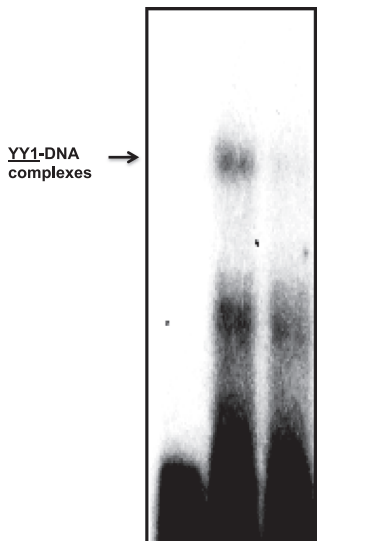**D**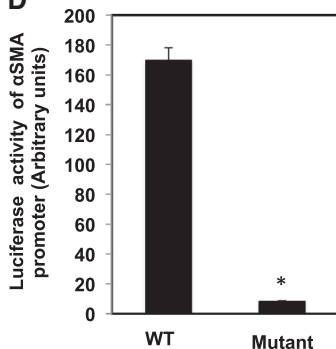

Supplement: MOESM4 [file 9552532]
